# Supplementary material for: First evidence of the feasibility of gaze-contingent attention training for school children with autism
Source: PubMed Central journal article supplement (PMC5070492; doi:10.1177/1362361315617880), 2016-02-09
Supplement: AUT617880_Supplementary_file.pdf [file AUT617880_Supplementary_file.pdf]

## Supplementary Materials

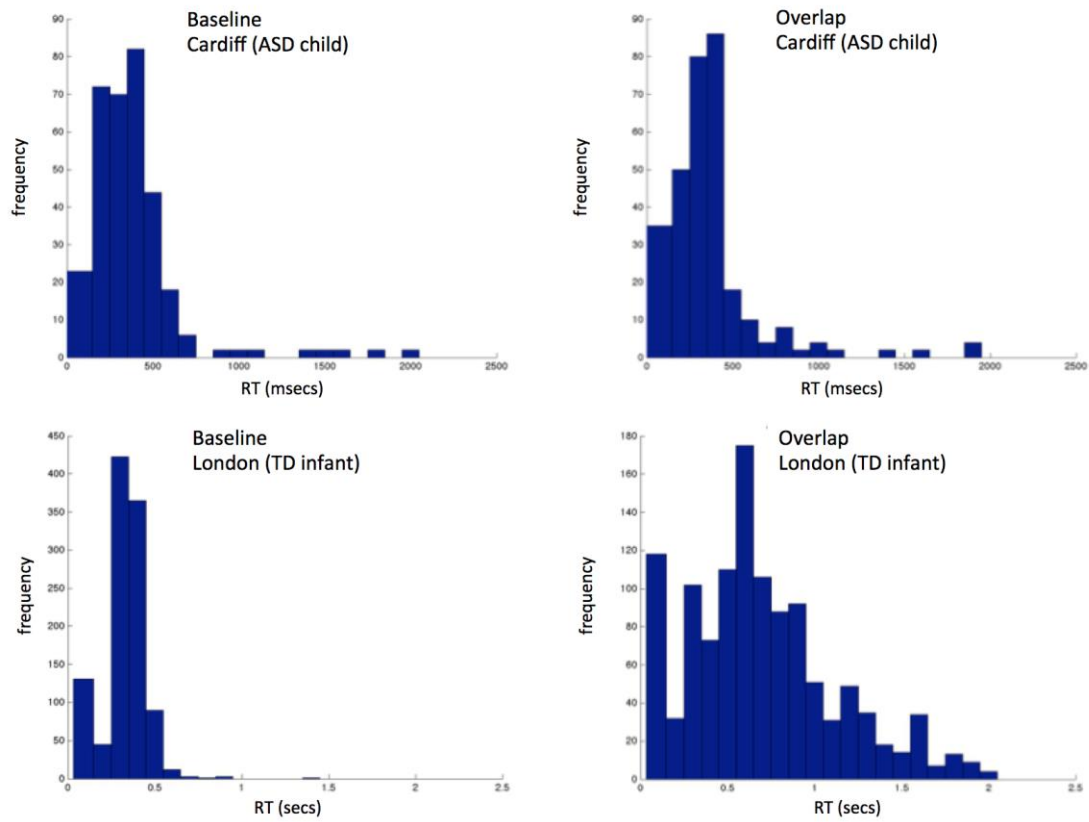

*Figure S1: Trial by trial data from the gap-overlap task. Raw data obtained from the two conditions is presented. Disengagement latencies are calculated, participant by participant, as the difference between average RTs obtained in the two conditions (Overlap-Baseline).*
